# Supplementary material for: An automated shotgun lipidomics platform for high throughput, comprehensive, and quantitative analysis of blood plasma intact lipids
Source: PubMed Central journal article supplement (PMC4606567; doi:10.1002/ejlt.201500145), 2015-07-20

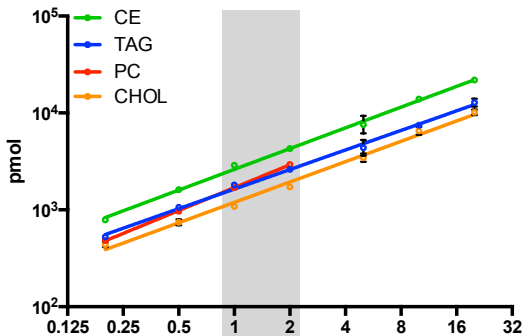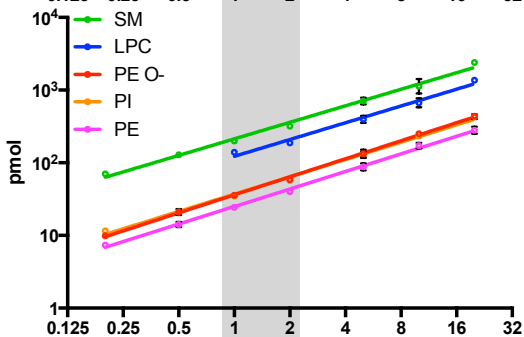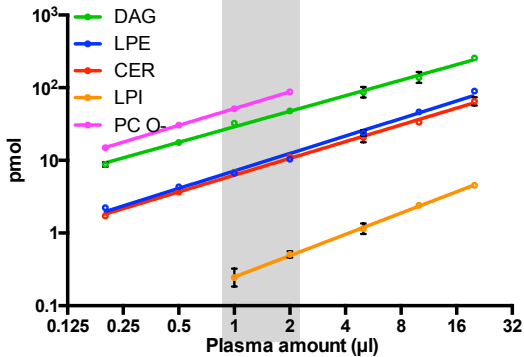

Supplement: ejlt0117-1540-sd2.pdf [file ejlt0117-1540-sd2.pdf]
